# Supplementary material
Source: publisher figshare collection journal article supplement (https://acs.figshare.com/ndownloader/files/4023682)
Supplement: Supplementary file 1 [file 4023682]

**Caffeic Acid Phenethyl Ester Inhibits Alpha-Melanocyte Stimulating Hormone-Induced  
Melanin Synthesis through Suppressing Transactivation Activity of Microphthalmia-  
Associated Transcription Factor**

*Ji-Yeon Lee,<sup>†,‡</sup> Hee-Jung Choi,<sup>†,‡</sup> Tae-Wook Chung,<sup>§</sup> Cheorl-Ho Kim,<sup>§</sup> Han-Sol Jeong,<sup>\*,†</sup> and  
Ki-Tae Ha<sup>\*,†</sup>*

<sup>†</sup> Division of Applied Medicine, School of Korean Medicine, Pusan National University,  
Yangsan, Gyeongnam, Republic of Korea

<sup>§</sup> Department of Molecular and Cellular Glycobiology, College of Natural Science,  
Sungkyunkwan University, Suwon, Kyungki-do, Republic of Korea

**Contents**

**S1.** Caffeic acid (**2**), phenethyl alcohol (**3**), and phenethyl cinnamate (**4**) did not significantly inhibit melanin synthesis.

**S2.** Caffeic acid phenethyl ester (**1**) inhibits the intracellular activity of tyrosinase.

**S3.** The sequences of promoter region of *TRP-1* and *TRP-2* genes were presented.

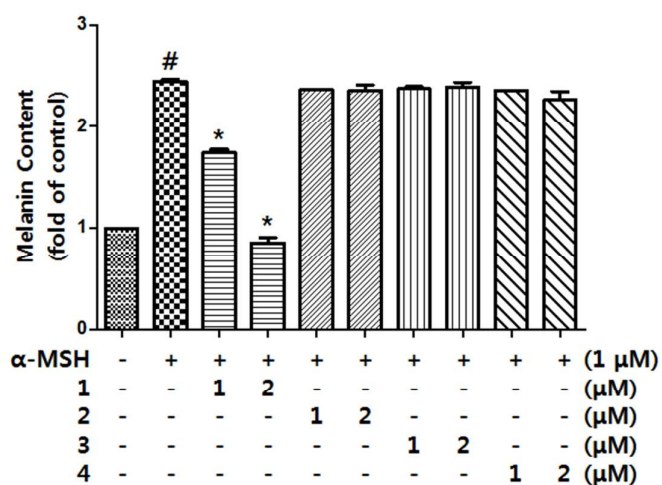

**S1.** Caffeic acid (**2**), phenethyl alcohol (**3**), and phenethyl cinnamate (**4**) did not significantly inhibit melanin synthesis. B16-F10 cells were cultured with  $\alpha$ -MSH (1  $\mu$ M) and/or **2-4** (at the indicated concentrations) for 72 h in phenol red-free DMEM. Caffeic acid phenethyl ester (**1**) was used for comparison. The cells were lysed with 1 M NaOH and were analyzed by spectrophotometry at 400 nm for estimating melanin contents (#  $p < 0.05$  in comparison with the control group and \*  $p < 0.05$  in comparison with the  $\alpha$ -MSH group).

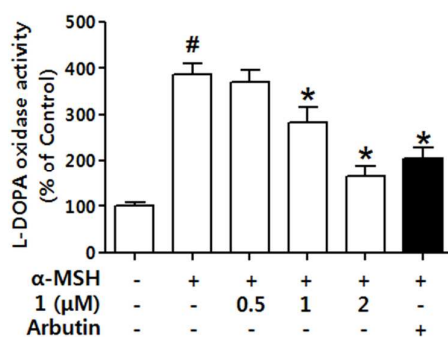

**S2.** Caffeic acid phenethyl ester (**1**) inhibits the intracellular activity of tyrosinase. B16-F10 cells were cultured with  $\alpha$ -MSH (1  $\mu$ M) and/or **1** (at the indicated concentrations) for 72 h.

The cells were lysed and equal amount (30 µg) of cell lysate was used for examining L-DOPA oxidase activity. Arbutin (100 µM) was used as a positive control purpose (#  $p < 0.05$  in comparison with the control group and \*  $p < 0.05$  in comparison with the  $\alpha$ -MSH group).

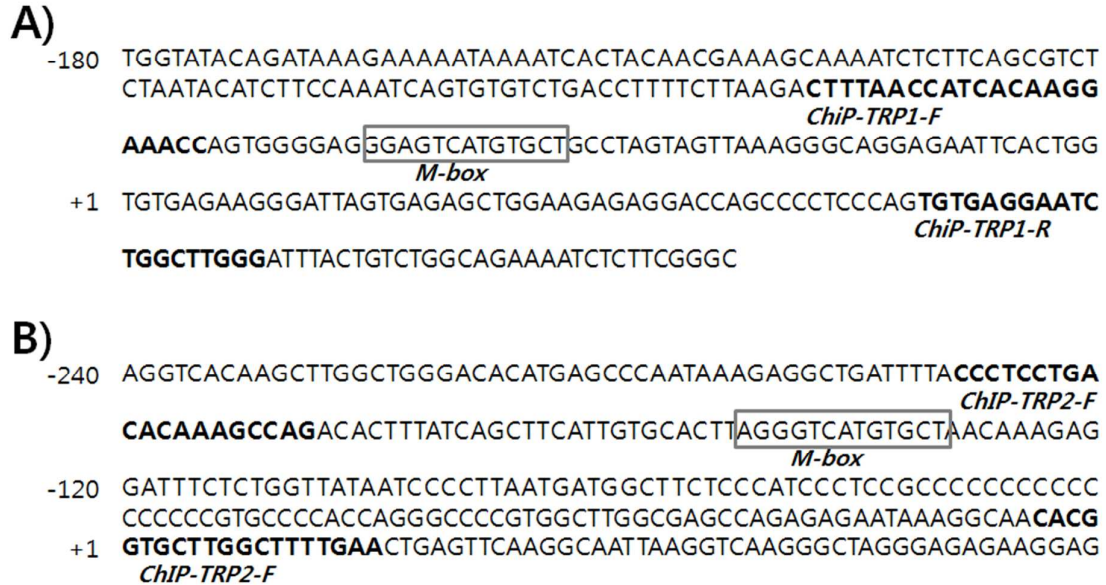

**S3.** The sequences of promoter region of *TRP-1* and *TRP-2* genes were presented. (A) The sequence 180 bp upstream to 60 bp downstream of the mouse *TRP-1* transcription site (+1) was represented. (B) The sequence 240 bp upstream to 60 bp downstream of the mouse *TRP-2* transcription site (+1) was shown. Primer sequences used for ChIP assay of MITF are indicated by bolded characters. M-box, the MITF binding site, is boxed and labeled.
